# Supplementary material
Source: publisher figshare collection journal article supplement (https://tandf.figshare.com/ndownloader/files/34015482)
Supplement: Supplementary file 1 [file 34015482]

ArcWaT: a model-based cell-by-cell GIS toolbox for estimating wave transformation during storm surge events

**Supplementary Material.**

Validation of Total Water Levels and Significant Wave Heights:


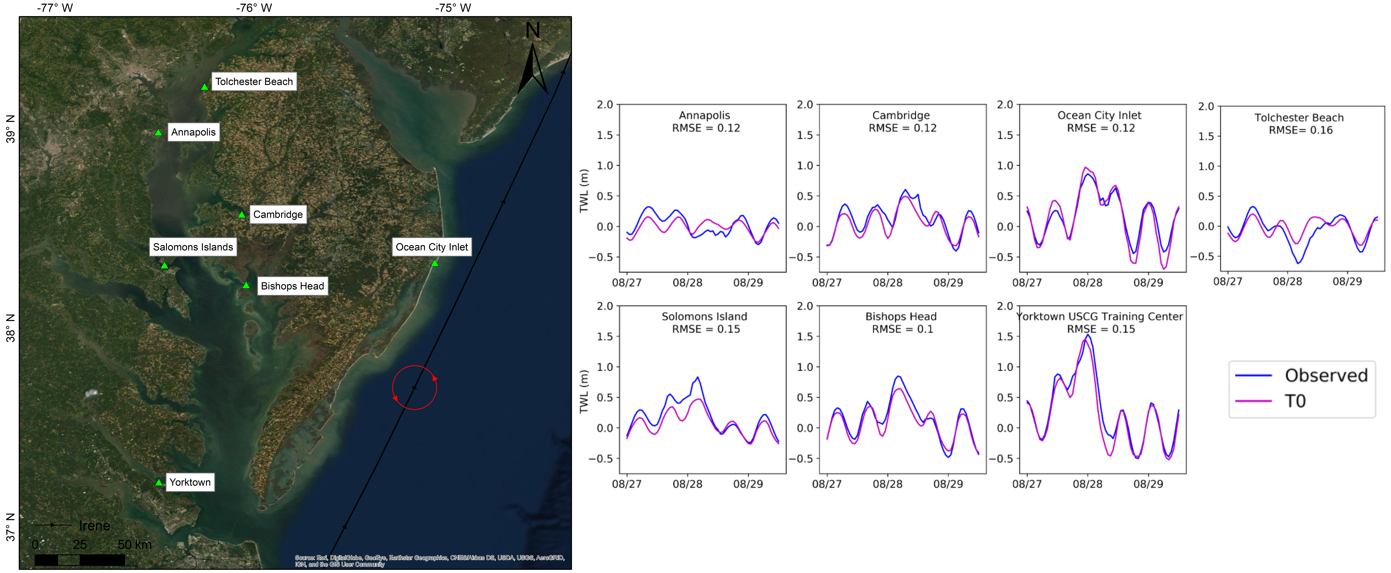


Figure 1. Validation of Total Water Levels (TWL) during Hurricane Irene.


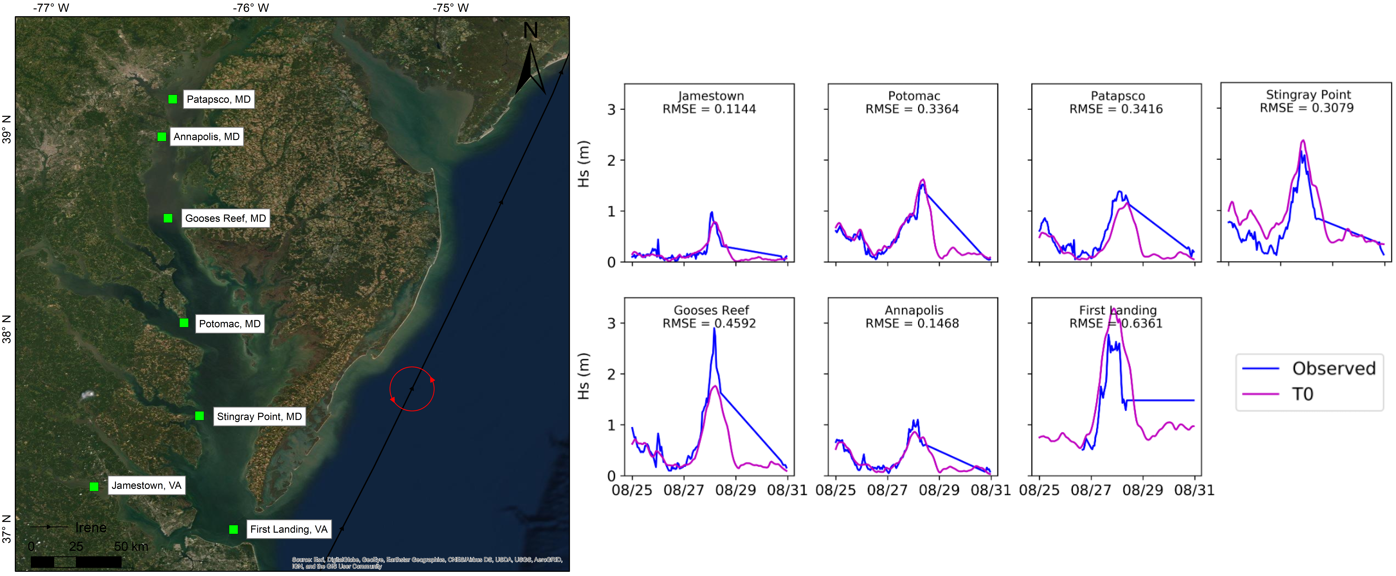


Figure 2. Validation of Significant Wave Heights (Hs) during Hurricane Irene.
